# Supplementary material
Source: MDPI journal article supplement (https://www.mdpi.com/2673-3897/4/2/12)

**Table S1. Variable coding and data decisions.**

Variable names and transformations from the original MCS codes or names.

| Variable                                                                     | Variable name     | Original MCS1<br>Variable name (if<br>different) | Changes made (if<br>any)                                                              |
|------------------------------------------------------------------------------|-------------------|--------------------------------------------------|---------------------------------------------------------------------------------------|
| Development below 2SD from mean<br>for sum of 12 main caregiver<br>responses | Sum_delay         |                                                  | Sum of delay<br>variables, cut at -<br>2SD to create a<br>binary variable             |
| Smiles                                                                       |                   | amsmila0                                         |                                                                                       |
| Sits up                                                                      |                   | amsitua0                                         |                                                                                       |
| Stands up holding on                                                         |                   | amstana0                                         |                                                                                       |
| Puts hands together                                                          |                   | amhanda0                                         |                                                                                       |
| Grabs objects                                                                |                   | amgraba0                                         |                                                                                       |
| Holds small objects                                                          |                   | ampicka0                                         |                                                                                       |
| Passes a toy                                                                 |                   | amptoya0                                         |                                                                                       |
| Walks a few steps                                                            |                   | amwalka0                                         |                                                                                       |
| Gives a toy                                                                  |                   | amgivea0                                         |                                                                                       |
| Waves bye-bye                                                                |                   | amwavea0                                         |                                                                                       |
| Extends arms                                                                 |                   | amarmsa0                                         |                                                                                       |
| Nods for yes                                                                 |                   | amnods0                                          |                                                                                       |
| Frequency mother sees her mother                                             | amsemo00          |                                                  |                                                                                       |
| Mother has other parents to talk to                                          | ampeta00          |                                                  | Likert scale: “can’t<br>say” recoded to mid-<br>value (neither agree<br>nor disagree) |
| Family would help if financial<br>problems                                   | ampefp00          |                                                  | Likert scale: “can’t<br>say” recoded to mid-<br>value (neither agree<br>nor disagree) |
| Number of types of financial help<br>from grandparents                       | Fin_help-n-types  |                                                  | Summed from<br>original variable                                                      |
| Frequency mother reports spending<br>time with friends                       | amfrti00          |                                                  |                                                                                       |
| Number of people who attended<br>birth                                       | n_people_at_birth | amwatb0a thru d                                  | Sum of people who<br>attended birth                                                   |
| Family-based infant care in work<br>hours                                    | Allocare_work     | amcawmaa                                         | Grandparent or<br>other relatives<br>coded vs all other<br>care                       |
| Grandparent lives in household                                               | ADGPAR00          |                                                  |                                                                                       |

Table S1 (continued 1)

| Variable                                                                      | Variable name | Original MCS1 variable name (if different) | Changes (if any)                                                                                                                                                                                                            |
|-------------------------------------------------------------------------------|---------------|--------------------------------------------|-----------------------------------------------------------------------------------------------------------------------------------------------------------------------------------------------------------------------------|
| Equivalised household income                                                  | advnceqinc    |                                            |                                                                                                                                                                                                                             |
| Age mother left full time education                                           | age_left_ed   | amlfte00                                   |                                                                                                                                                                                                                             |
| Partner's SES from job                                                        | APD07S00      |                                            |                                                                                                                                                                                                                             |
| Partner's employment status                                                   | APDACT00      |                                            |                                                                                                                                                                                                                             |
| Mother employed                                                               | Work_now      | amwksi00                                   |                                                                                                                                                                                                                             |
| Winter temperature in room where baby sleeps                                  | amtempa0      |                                            |                                                                                                                                                                                                                             |
| Mother's report of pollution & grime in neighbourhood                         | amarpg00      |                                            |                                                                                                                                                                                                                             |
| Maternal beliefs: Baby should be picked up when cries                         | ampcry00      |                                            | Likert scale: "can't say" recoded to mid-value (neither agree nor disagree)                                                                                                                                                 |
| Maternal beliefs: Stimulation is important for infant development             | amstim00      |                                            | Likert scale: "can't say" recoded to mid-value (neither agree nor disagree)                                                                                                                                                 |
| Maternal beliefs: Talking to infants is important                             | amtalk00      |                                            | Likert scale: "can't say" recoded to mid-value (neither agree nor disagree)                                                                                                                                                 |
| Maternal beliefs: cuddling infants is important                               | amcuddl00     |                                            | Likert scale: "can't say" recoded to mid-value (neither agree nor disagree)                                                                                                                                                 |
| Bed co-sleeping with a parent was main sleeping arrangement in first 9 months | Bed_coslp     | amslbmaa                                   | If parent responded that infant sleeps in the parents' bed, coded as 2, else 1. Variable represents first response for infant sleeping arrangement – secondary sleeping arrangements not included in variable construction. |
| Breastfed at least 1 week                                                     | Breast_1w     | ambfeva0, ambfeaa0                         | Binary variable created representing breastfeeding at least 1 week = 2, else 1.                                                                                                                                             |
| Main work hours infant care is daycare centre                                 | daycare       | amcawmaa                                   | Recoded from original                                                                                                                                                                                                       |
| Main work hours infant care is mother                                         | parents       | amcawmaa                                   | Recoded from original                                                                                                                                                                                                       |

Table S1 (continued 2)

| Variable                                                  | Variable name        | Original MCS1 variable name (if different) | Changes (if any)                                      |
|-----------------------------------------------------------|----------------------|--------------------------------------------|-------------------------------------------------------|
| Birthweight (kg)                                          | bthwt_kg             | ambiwta0, amwtkg0, amwtlba0, amwtoua0      | Changed to kg where recorded in lbs and oz            |
| Number of pharmacological pain interventions in labour    | n_pain_interventions | amprwm0a thru f                            | Summed from original variables                        |
| Infant conceived using fertility treatment or ART         | amfetr00             |                                            | Recoded from type to yes or no                        |
| Duration of labour                                        | amlola00             |                                            |                                                       |
| Type of delivery                                          | amdewma00            |                                            | Recoded to 1=normal, C-section, emergency and other=2 |
| Singleton birth                                           | ahnoba00             |                                            |                                                       |
| Pregnancy related illnesses (e.g., preeclampsia)          | amilpr00             |                                            | Recoded to 1=yes, 2=no                                |
| Place of birth                                            | amplbi00             |                                            | Recoded to hospital versus other                      |
| How long mother and infant stayed in hospital after birth | amstho00             |                                            |                                                       |
| Received full ante-natal care                             | amanca00             |                                            | Recoded to 1=yes, 2=no                                |
| Infant's sex                                              | ahcsex00             |                                            |                                                       |
| Infant has all immunisations                              | amimmua00            |                                            |                                                       |
| Infant's age in days when mother was interviewed          | ahbage00             |                                            |                                                       |
| Infant's number of reported illness (by 9 months)         | amadmoa00            |                                            |                                                       |
| Infant's number of reported accidents or injuries         | amaccaa00            |                                            |                                                       |

Table S1 (continued 3)

| Variable                                                | Variable name | Original MCS1 variable name (if different) | Changes (if any)                                             |
|---------------------------------------------------------|---------------|--------------------------------------------|--------------------------------------------------------------|
| Mother's birth year                                     | Mums_birth    | ampdby00, amcrel00                         |                                                              |
| Mother reports being tired all the time                 | amtire00      |                                            |                                                              |
| Mother reports being depressed                          | amdepr00      |                                            |                                                              |
| Average number of cigarettes mother smokes per day      | amsmma00      |                                            | "not applicable" recoded as "0"                              |
| Frequency mother drinks alcohol                         | amaldr00      |                                            |                                                              |
| Mother has longstanding illness                         | amloil00      |                                            |                                                              |
| Number of months pregnant at interview                  | amarpg00      |                                            | "not applicable" recoded as "0" (n/a indicates not pregnant) |
| Ethnicity                                               | AMD08E00      |                                            |                                                              |
| Father present in household                             | dad_not_pres  | amlibo00                                   | Recoded to yes or no                                         |
| Father's age when infant was born                       | part_age      | appdby00                                   |                                                              |
| Paternal involvement score: how much help father is     | paternal_inv  | aploaf00, apnach00, apoffe00, apgetu00     | Sum of paternal help variables                               |
| Birth interval in months from older sibling             | MC_IBI_1      |                                            | Missing for all 1 <sup>st</sup> borns                        |
| Number of siblings in household                         | ADOTHS00      |                                            |                                                              |
| Mother reports partner sensitive and aware of her needs | amrese00      |                                            |                                                              |

Figure S1. Two way plots showing the direction of effect between each predictor in the full RF model and developmental delay. Lines are Lowess, quadratic or linear, depending on which best visually summarises the observed relationship. The y-axis is the proportion of infants with developmental delay.

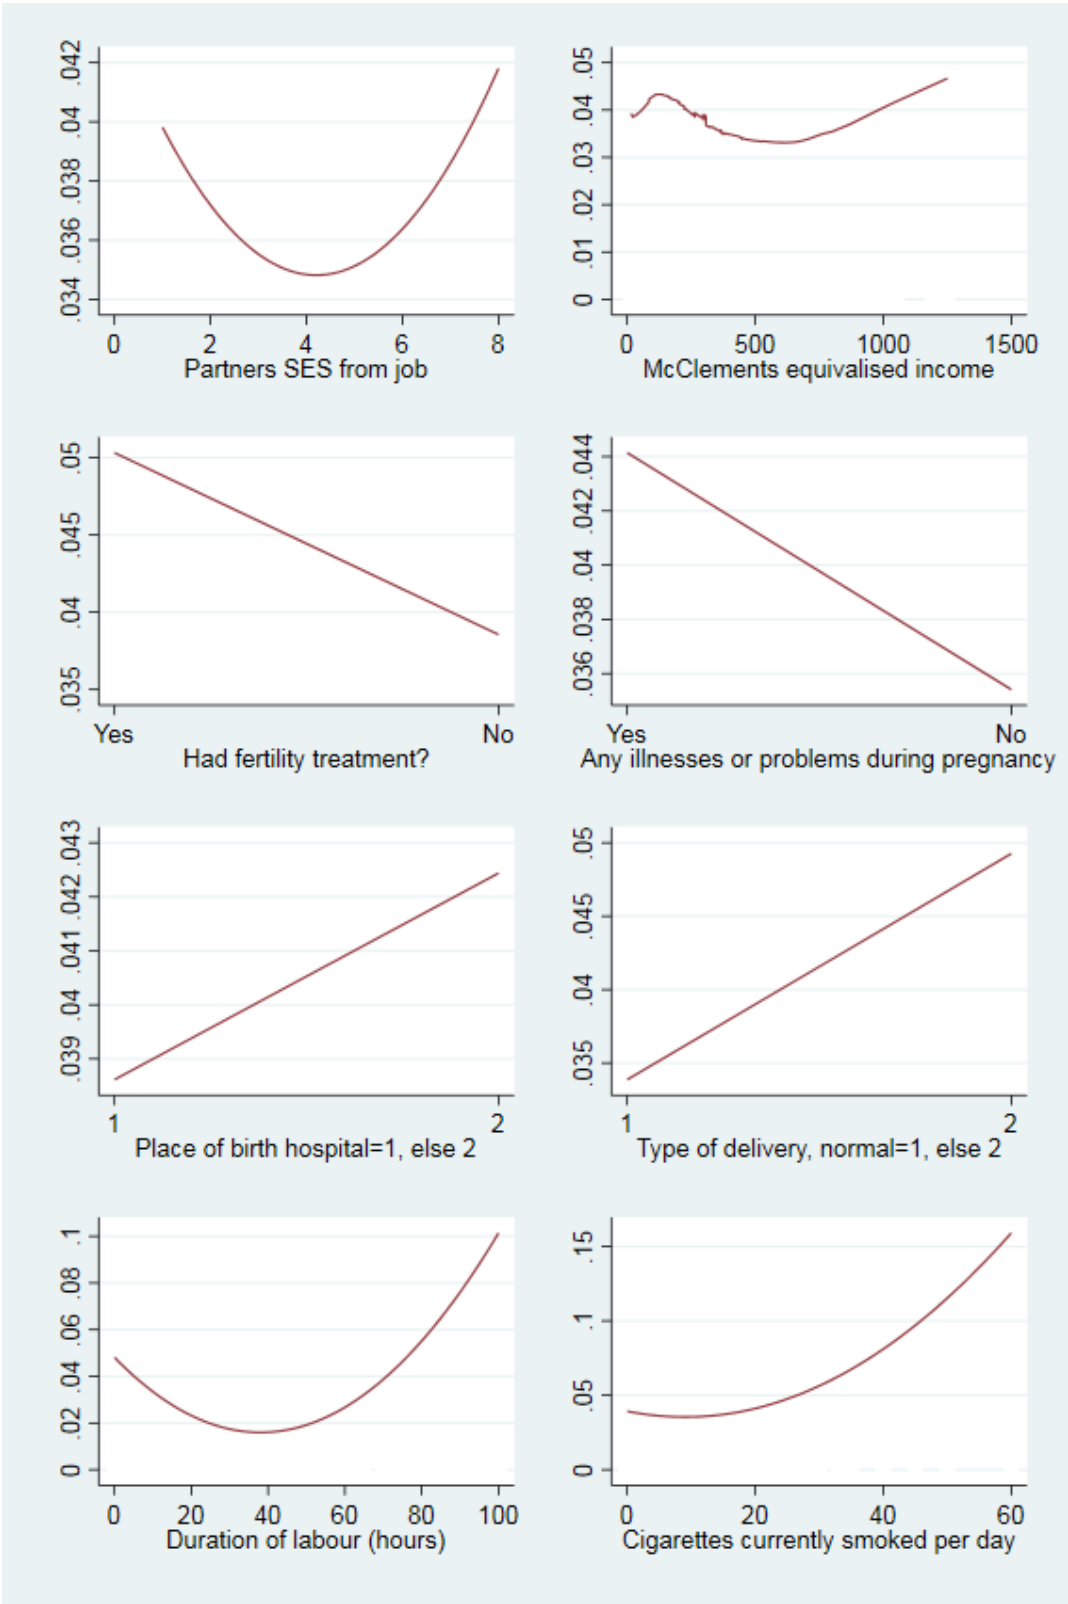

Figure S1 Continued 1:

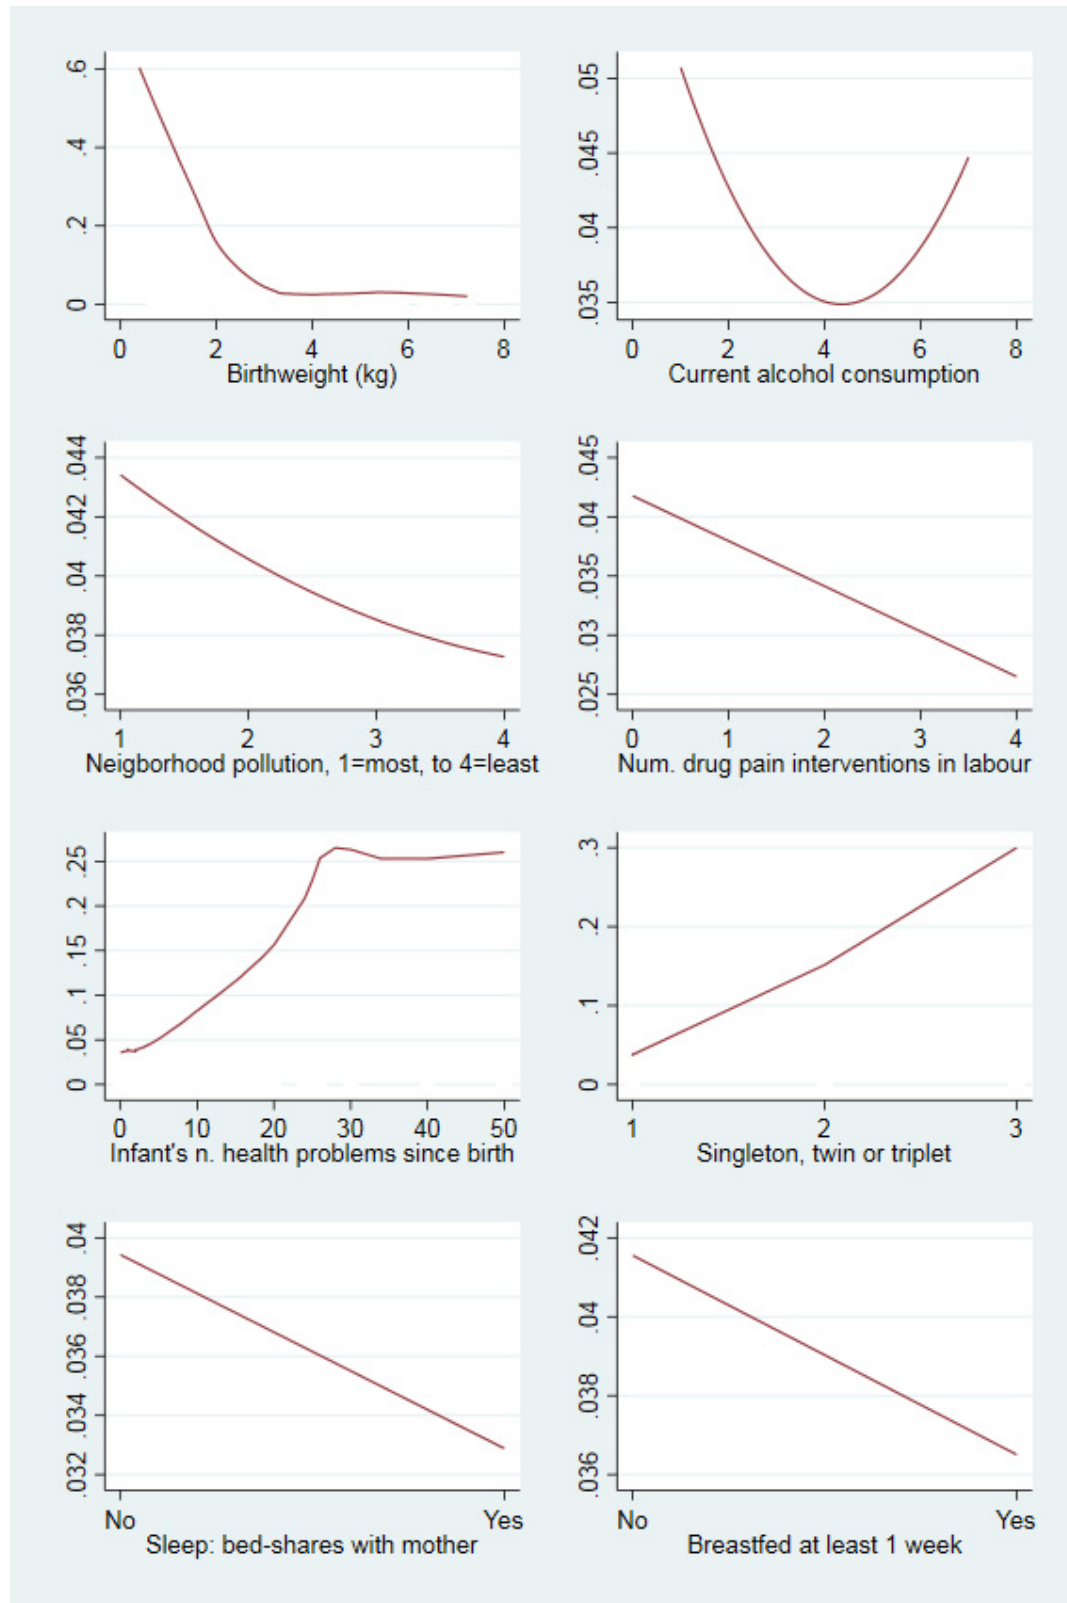

Figure S1 Continued 2:

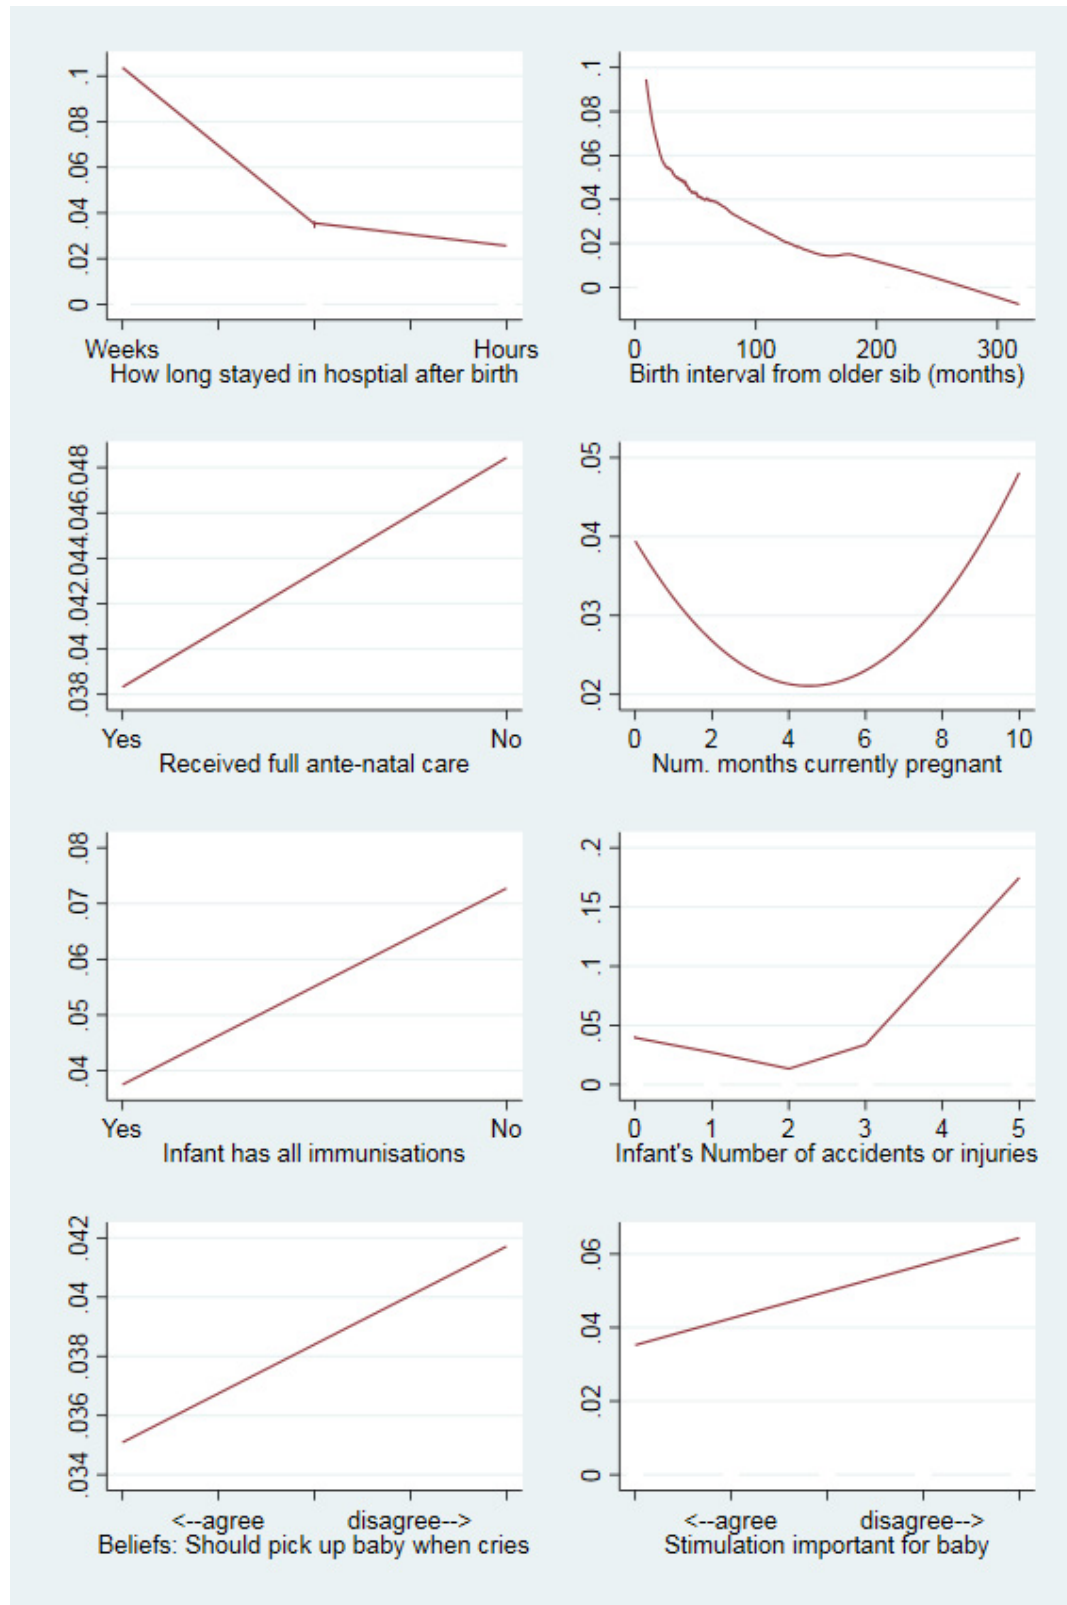

Figure S1 Continued 3:



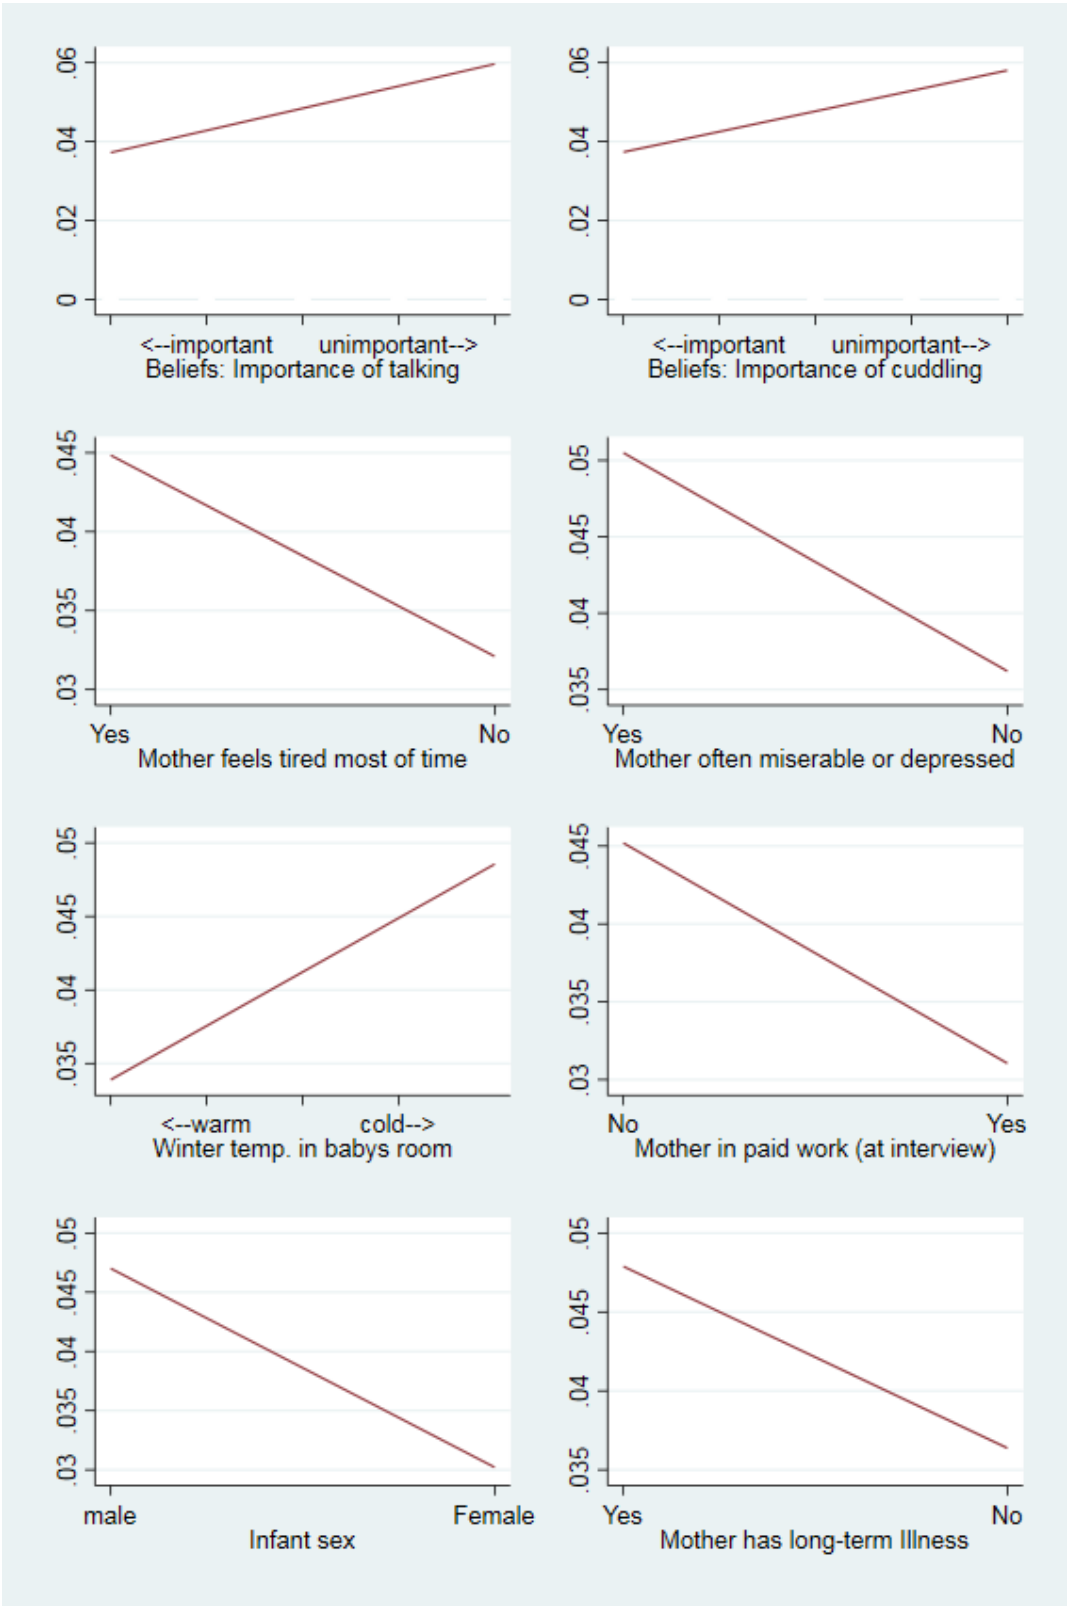

Figure S1 Continued 4:

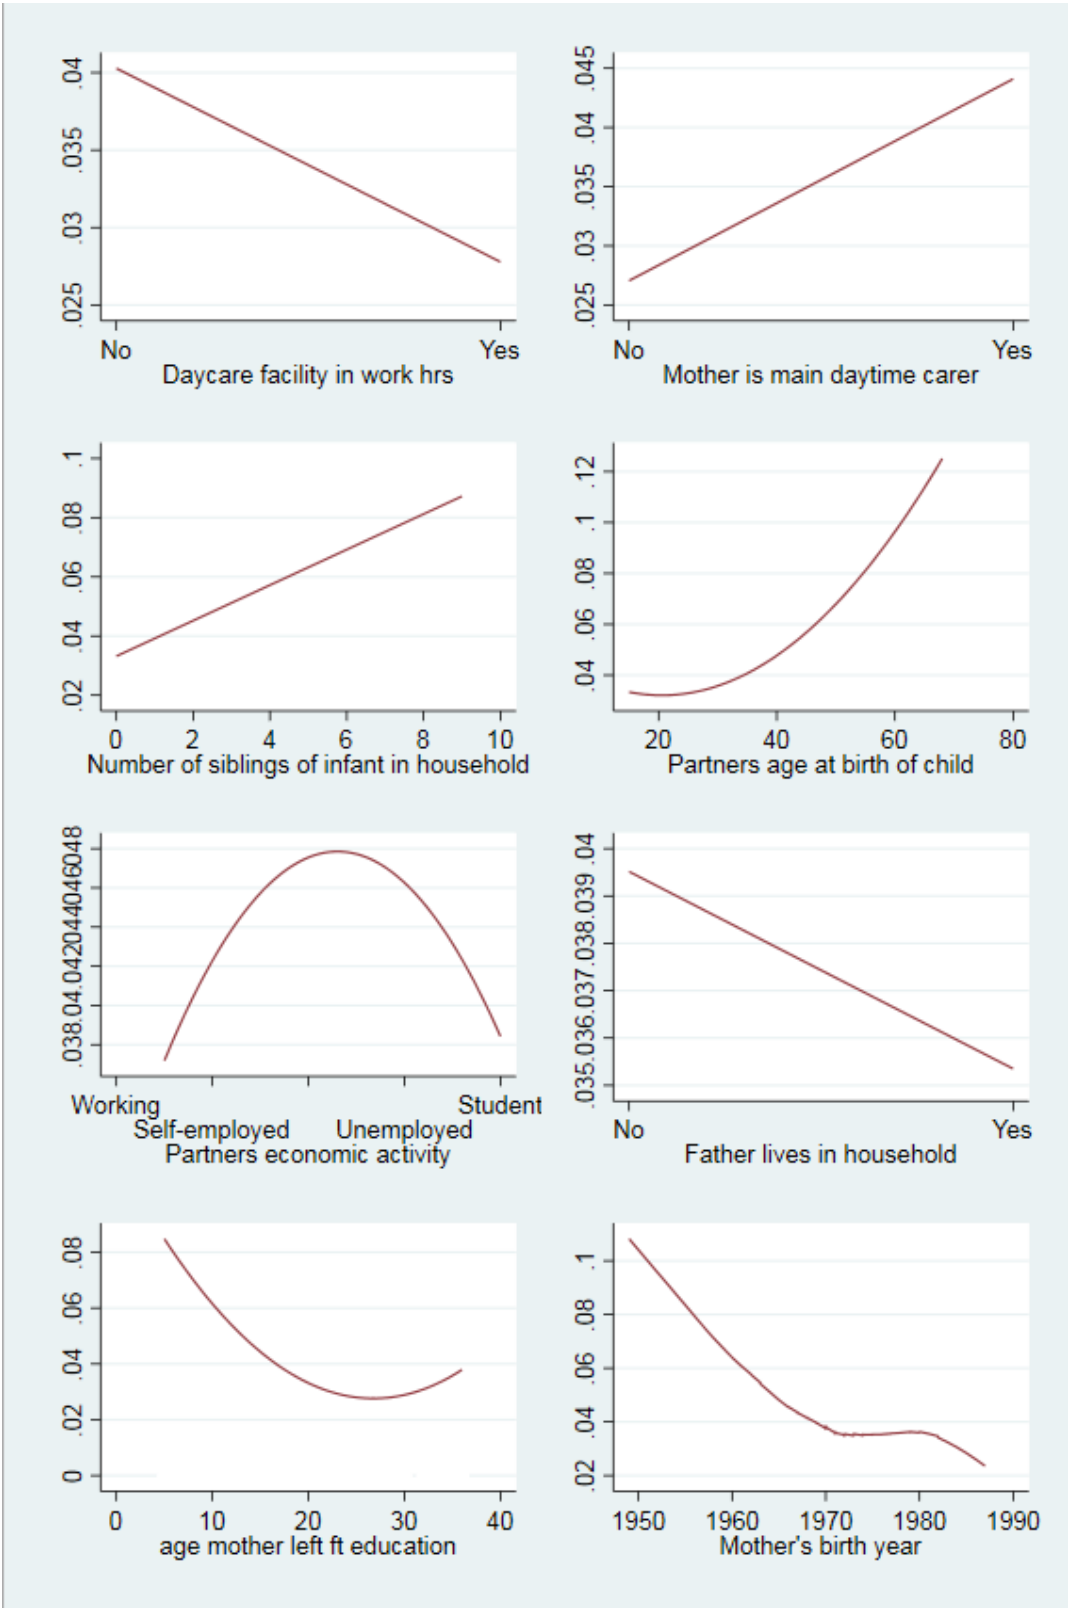

Figure S1 Continued 5:

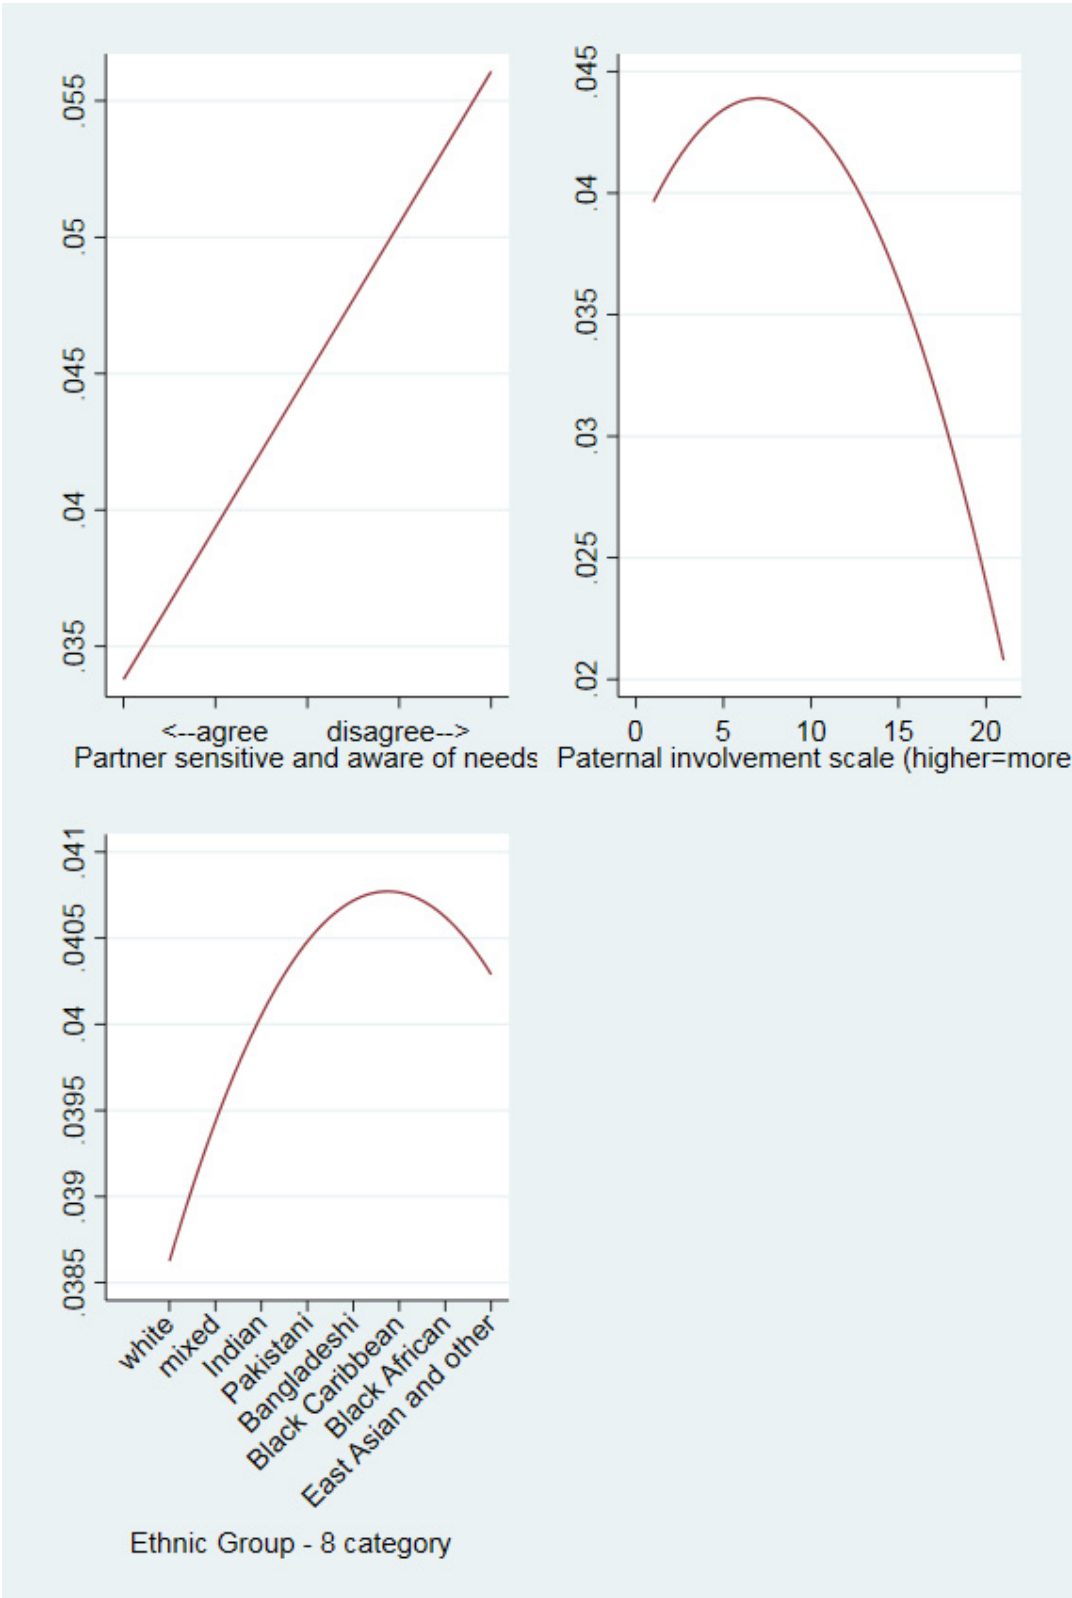

Supplement: s1 [file s1]
